# Supplementary material
Source: publisher figshare collection journal article supplement (https://f1000.figshare.com/ndownloader/files/1349766)
Supplement: Supplementary file 1 [file 1349766]

Native Id	Native Ranks	Decoy Id	Decoy Ranks
1	16.8253	1	15.8409
2	15.5337	2	16.2273
3	17.5578	3	15.9699
4	16.6937	4	15.1925
5	16.5758	5	15.6408
6	17.2108	6	12.759
7	16.4392	7	13.5966
8	17.3817	8	14.0418
9	16.9541	9	13.2365
10	17.3161	10	12.4984
11	15.7332	11	13.6926
12	17.319	12	13.2613
13	18.1027	13	13.0126
14	17.3688	14	14.2298
15	16.5256	15	14.3017
16	16.0739	16	14.3893
17	17.1864	17	13.3137
18	17.7225	18	13.2472
19	17.1123	19	13.5481
20	16.9716	20	13.9609
21	17.4682	21	13.9434
22	17.9498	22	13.5468
23	18.0421	23	13.0158
24	17.9277	24	12.3932
25	17.9031	25	13.712
26	17.3798	26	14.2582
27	17.7851	27	13.0155
28	16.6341	28	15.0067
29	17.1531	29	13.5536
30	18.7667	30	14.2311
31	17.3649	31	14.3981
32	16.8658	32	13.0177
33	18.2901	33	13.7939
34	16.3208	34	13.8212
35	16.4476	35	13.4095
36	17.5631	36	13.3828
37	15.6657	37	14.6525
38	16.4025	38	13.4651
39	16.4118	39	14.621
40	18.3177	40	14.2292
41	17.4447	41	13.1631
42	17.6302	42	14.4119
43	17.7777	43	14.3358
44	16.2251	44	11.481
45	17.4318	45	13.9804
46	16.8136	46	14.5971
47	16.8366	47	12.4957
48	17.1738	48	13.9372
49	16.5027	49	11.5949
50	15.9969	50	14.1882
51	16.5969	51	13.5069
52	17.3794	52	12.735
53	18.2939	53	13.6327
54	17.7275	54	14.6887
55	16.7279	55	13.0876
56	16.2599	56	12.7813
57	18.1322	57	14.4679
58	17.1123	58	13.5325
59	17.9812	59	13.6065
60	17.8743	60	14.0104
61	17.3496	61	14.0839
62	17.3963	62	15.1851
63	17.8991	63	12.7226
64	17.1828	64	13.5355
65	17.1677	65	13.1808
66	16.3522	66	12.6072
67	17.0174	67	14.5077
68	16.8957	68	13.381
69	17.94	69	13.071
70	17.7135	70	14.8872
71	16.9573	71	12.7893
72	16.8074	72	13.1444
73	18.2278	73	13.6186
74	17.5574	74	12.2911
75	17.8205	75	13.7647
76	17.6088	76	13.4056
77	17.2163	77	13.7522
78	17.3169	78	13.3006
79	17.4689	79	14.1492
80	17.0372	80	14.0747
81	17.8007	81	13.0293
82	17.2041	82	13.2864
83	16.4544	83	15.5604
84	16.9984	84	13.4388
85	17.3002	85	15.0505
86	16.0711	86	13.3107
87	16.1969	87	13.1158
88	17.7686	88	13.8569
89	16.9496	89	15.2788
90	17.8473	90	13.4736
91	16.0187	91	13.8863
92	16.0265	92	15.894
93	18.0518	93	13.5775
94	16.8157	94	13.9937
95	16.8284	95	13.1445
96	17.9789	96	13.5141
97	18.128	97	13.3485
98	16.4379	98	14.292
99	18.2078	99	12.9006
100	18.4299	100	15.1019
101	17.1128	101	12.75
102	17.4145	102	13.0854
103	16.7514	103	16.0653
104	16.806	104	13.2689
105	15.7193	105	13.7944
106	17.4394	106	13.539
107	16.5144	107	13.2321
108	16.8044	108	13.7314
109	18.1636	109	13.2433
110	17.2855	110	13.5473
111	16.7353	111	14.4595
112	18.095	112	15.6544
113	17.8992	113	13.9707
114	16.2824	114	12.4429
115	16.8963	115	12.9649
116	17.5445	116	13.9376
117	17.5335	117	14.6975
118	17.2596	118	14.5327
119	17.5335	119	13.1263
120	17.2185	120	13.6841
121	16.9379	121	13.0184
122	17.1066	122	14.4801
123	17.4254	123	14.0637
124	17.1202	124	14.1689
125	17.578	125	14.6904
126	17.3318	126	13.5453
127	18.4004	127	12.5052
128	16.9736	128	13.2016
129	15.8835	129	12.419
130	17.3838	130	13.8419
131	16.6179	131	13.6664
132	17.687	132	12.1727
133	17.0395	133	13.5855
134	18.3917	134	13.0512
135	17.5333	135	12.8362
136	17.515	136	12.4842
137	16.2455	137	14.0762
138	16.7616	138	13.8655
139	16.7369	139	13.9365
140	16.5503	140	13.8641
141	17.6989	141	13.5045
142	17.0609	142	13.3372
143	17.839	143	14.1243
144	17.1668	144	13.2175
145	17.2936	145	14.0134
146	18.2967	146	13.8709
147	16.8272	147	12.8237
148	17.769	148	12.3811
149	17.3768	149	12.8031
150	17.196	150	13.0106
151	17.1812	151	13.0412
152	17.2088	152	13.4761
153	16.9809	153	12.9196
154	17.6805	154	13.8663
155	17.3216	155	14.0879
156	17.2111	156	13.3393
157	18.318	157	13.0759
158	17.8488	158	13.2272
159	17.2317	159	12.6633
160	17.1284	160	12.9843
161	16.9116	161	13.2531
162	17.2839	162	13.161
163	16.6123	163	13.7973
164	16.852	164	13.279
165	16.635	165	12.6398
166	18.3252	166	14.3652
167	17.6537	167	12.6028
168	16.9418	168	13.7255
169	17.5358	169	13.1431
170	17.7105	170	12.3603
171	19.4903	171	14.5785
172	18.0524	172	13.2162
173	16.7023	173	13.6989
174	17.1474	174	13.52
175	17.592	175	13.1385
176	17.0431	176	14.2919
177	17.88	177	13.0361
178	17.2907	178	15.0039
179	16.8841	179	13.8312
180	16.8994	180	13.7917
181	17.5733	181	12.8755
182	16.9258	182	15.5253
183	16.7755	183	13.545
184	17.0087	184	14.0059
185	17.4136	185	13.0518
186	18.1739	186	14.0183
187	17.3398	187	12.4872
188	16.3971	188	11.8654
189	17.4942	189	13.8995
190	17.6142	190	13.7132
191	16.708	191	12.7074
192	18.457	192	14.4508
193	16.9193	193	14.262
194	18.3533	194	13.0032
195	17.6764	195	14.0397
196	17.1804	196	13.1179
197	17.7292	197	12.4038
198	17.6635	198	12.0059
199	17.4157	199	11.9884
200	17.7747	200	14.2472
201	17.642	201	16.4499
202	17.4139	202	13.5661
203	17.0301	203	12.6747
204	16.462	204	12.9531
205	16.6764	205	13.9381
206	15.6132	206	11.7764
207	17.1857	207	13.3627
208	17.268	208	13.52
209	17.0139	209	14.3397
210	18.1406	210	13.3883
211	16.6789	211	13.4197
212	18.2388	212	12.9842
213	17.8494	213	13.8985
214	17.7913	214	13.7255
215	18.815	215	13.3211
216	17.1935	216	13.9601
217	16.4246	217	12.6803
218	17.8059	218	14.3798
219	17.2602	219	13.4185
220	17.2213	220	13.67
221	18.4498	221	14.5457
222	16.8373	222	14.7768
223	17.1236	223	13.6932
224	17.9057	224	13.7892
225	17.0973	225	12.6145
226	17.1461	226	13.8742
227	17.162	227	15.0286
228	18.2864	228	12.7604
229	18.0302	229	14.3173
230	17.6913	230	14.4393
231	17.6899	231	12.8717
232	16.7702	232	14.2481
233	16.5119	233	15.0817
234	18.3121	234	12.4602
235	17.5694	235	14.1688
236	16.75	236	13.9136
237	17.2503	237	13.6075
238	17.5882	238	14.6089
239	17.6051	239	15.2158
240	17.5991	240	14.2611
241	16.9997	241	14.5591
242	17.2842	242	13.759
243	17.4212	243	12.9523
244	16.4893	244	14.604
245	18.5354	245	14.3438
246	18.0065	246	12.885
247	18.0809	247	11.877
248	17.5031	248	13.6426
249	17.7807	249	12.9796
250	17.1872	250	12.6662
251	15.6909	251	13.1675
252	17.4247	252	13.2216
253	17.9374	253	13.6456
254	18.2606	254	12.3023
255	16.7219	255	13.8372
256	17.8833	256	13.9069
257	16.517	257	13.521
258	17.5298	258	13.7602
259	18.3737	259	14.7432
260	16.8371	260	13.697
261	17.6326	261	13.0743
262	17.1648	262	14.2234
263	17.2672	263	11.4304
264	15.44	264	14.362
265	17.5402	265	13.7944
266	17.1518	266	13.628
267	17.0344	267	13.5406
268	17.8338	268	14.5922
269	17.1409	269	14.1244
270	16.1295	270	12.6161
271	17.7212	271	13.0495
272	18.1701	272	13.2588
273	17.0713	273	13.7496
274	16.896	274	12.2561
275	17.7175	275	12.85
276	17.4724	276	13.4149
277	17.2699	277	16.1104
278	17.3943	278	14.2029
279	17.5237	279	13.6365
280	17.8731	280	12.5819
281	16.7961	281	14.7369
282	17.7347	282	14.3987
283	17.6758	283	13.5116
284	17.1068	284	14.2394
285	17.1902	285	13.0875
286	17.1958	286	13.7278
287	16.0684	287	13.3847
288	17.0563	288	12.9899
289	16.8937	289	13.4144
290	17.0155	290	13.1363
291	16.2846	291	14.4732
292	19.2516	292	12.8881
293	17.8219	293	13.5785
294	19.2001	294	12.3488
295	16.1061	295	15.3252
296	17.6105	296	15.5649
297	16.3317	297	13.5753
298	17.076	298	11.9977
299	17.1943	299	14.3949
300	16.9779	300	14.4529
301	17.3477	301	12.8532
302	16.8206	302	14.8957
303	18.2758	303	13.5205
304	17.2223	304	12.8661
305	16.8179	305	13.3781
306	16.6298	306	12.5549
307	17.2691	307	13.3469
308	17.6903	308	14.0257
309	15.873	309	14.8719
310	17.5764	310	13.3617
311	16.7731	311	14.4148
312	17.0438	312	14.284
313	16.6003	313	12.9339
314	16.4967	314	13.964
315	16.4042	315	13.7617
316	17.4812	316	15.7878
317	16.8345	317	15.4086
318	16.6378	318	14.559
319	16.9368	319	13.9351
320	17.7257	320	12.5954
321	17.1131	321	13.0719
322	17.2822	322	12.8217
323	17.2689	323	13.2224
324	17.6261	324	13.2097
325	18.1522	325	13.591
326	16.8203	326	14.4176
327	17.0993	327	14.4028
328	17.5349	328	13.3653
329	16.8949	329	12.0161
330	16.3004	330	13.0818
331	17.4432	331	12.8463
332	16.8495	332	14.135
333	16.6553	333	14.6699
334	15.9306	334	14.7567
335	18.6347	335	13.4593
336	17.9875	336	14.1073
337	17.2071	337	13.2745
338	17.3605	338	14.7387
339	17.5053	339	14.6413
340	16.8538	340	12.8879
341	16.9093	341	13.66
342	17.2642	342	14.7629
343	16.2797	343	13.8829
344	16.9485	344	14.647
345	16.8198	345	14.0303
346	17.2479	346	12.8491
347	17.1082	347	13.8543
348	16.8424	348	12.0655
349	16.9762	349	12.9073
350	16.5554	350	12.4
351	16.8293	351	12.7602
352	17.3395	352	13.2996
353	16.7348	353	15.419
354	17.1831	354	13.9666
355	17.1928	355	13.6495
356	16.9462	356	13.151
357	17.2971	357	14.5487
358	17.3723	358	13.1629
359	17.8457	359	14.1302
360	18.5073	360	13.8612
361	16.1583	361	12.5176
362	16.8588	362	13.3339
363	17.3426	363	13.4974
364	17.5969	364	12.7771
365	16.8776	365	14.3236
366	16.7947	366	14.2283
367	16.9085	367	13.6785
368	17.911	368	13.3506
369	17.9263	369	14.2798
370	16.4238	370	14.2281
371	18.3368	371	14.7292
372	18.851	372	13.2174
373	16.7672	373	11.7161
374	16.1773	374	14.2965
375	17.0329	375	14.3467
376	17.303	376	13.9101
377	17.2455	377	13.0793
378	16.7309	378	14.1973
379	17.3552	379	14.0824
380	16.6613	380	13.7716
381	17.753	381	15.3984
382	17.5588	382	13.4226
383	18.2525	383	14.329
384	16.9203	384	13.7869
385	16.5824	385	13.7741
386	17.8906	386	12.8318
387	17.2263	387	13.3925
388	17.723	388	13.4401
389	17.1364	389	12.2275
390	17.8924	390	13.7524
391	15.9924	391	12.299
392	18.2859	392	13.9248
393	17.2003	393	13.775
394	17.5976	394	13.4616
395	18.2873	395	14.5815
396	17.9164	396	14.5654
397	17.3713	397	12.5884
398	17.175	398	13.8794
399	16.3659	399	14.6543
400	17.7606	400	14.658
401	17.5381	401	13.775
402	18.1525	402	13.4993
403	16.6196	403	14.5111
404	18.205	404	13.4342
405	16.8791	405	13.2786
406	16.9319	406	14.2479
407	17.9807	407	12.8819
408	18.3365	408	13.238
409	17.3385	409	13.1874
410	18.1083	410	13.0327
411	17.6871	411	13.5899
412	17.1578	412	13.0262
413	17.6722	413	13.3842
414	17.2878	414	13.6867
415	16.9766	415	14.1978
416	16.9965	416	14.7905
417	17.787	417	14.6842
418	17.8748	418	14.1983
419	16.1004	419	13.1214
420	18.035	420	14.2257
421	18.8439	421	14.1482
422	18.4013	422	11.963
423	17.1627	423	14.6197
424	16.2112	424	14.4463
425	17.4688	425	14.4756
426	16.4913	426	13.7068
427	16.9717	427	13.4969
428	18.4023	428	13.2802
429	17.91	429	14.4216
430	17.8559	430	12.1881
431	17.7966	431	13.5753
432	17.2388	432	13.6236
433	18.1802	433	12.3679
434	16.4835	434	14.3399
435	17.9523	435	12.7897
436	17.151	436	12.703
437	17.0792	437	13.7615
438	17.5054	438	14.0177
439	16.4924	439	14.0519
440	16.4709	440	14.6003
441	17.5628	441	13.1768
442	17.6011	442	13.9395
443	17.1921	443	13.0876
444	17.6091	444	12.839
445	17.2634	445	14.4411
446	17.7578	446	13.175
447	16.5308	447	13.2154
448	17.3966	448	13.5773
449	17.9762	449	13.2049
450	16.9713	450	12.9779
451	16.7958	451	14.1293
452	17.7113	452	14.4859
453	17.5702	453	13.627
454	16.8336	454	12.7786
455	17.5536	455	12.4747
456	17.682	456	14.4999
457	17.5703	457	11.8533
458	15.4859	458	13.2807
459	15.9919	459	12.7313
460	17.1162	460	12.7189
461	16.6172	461	13.3692
462	17.2649	462	15.0126
463	16.5498	463	14.4018
464	17.9527	464	13.3207
465	17.7484	465	13.7662
466	17.5832	466	12.2312
467	17.8185	467	12.7358
468	16.8916	468	13.6334
469	17.0181	469	13.7317
470	18.8151	470	13.9213
471	16.9162	471	13.9508
472	18.1086	472	13.0068
473	17.9833	473	14.0644
474	16.9872	474	13.1266
475	16.2974	475	12.4883
476	17.2591	476	13.14
477	16.7259	477	13.2877
478	17.0782	478	15.2711
479	17.0441	479	13.2358
480	17.8713	480	14.6492
481	16.296	481	13.4835
482	17.6159	482	12.5257
483	17.769	483	13.5493
484	17.185	484	13.8807
485	17.7466	485	14.0259
486	16.5836	486	14.7523
487	18.139	487	12.5127
488	17.0244	488	13.2062
489	17.7953	489	13.9552
490	17.9985	490	12.5707
491	17.4957	491	12.0084
492	17.2571	492	14.3043
493	18.5865	493	13.6023
494	17.2298	494	12.499
495	16.352	495	14.1859
496	18.0197	496	13.7709
497	17.7084	497	13.6196
498	17.6559	498	13.4399
499	17.2957	499	12.4994
500	16.8423	500	13.2411
501	17.6124	501	13.6905
502	19.2742	502	13.2104
503	17.3413	503	13.9778
504	17.1802	504	14.7211
505	17.4261	505	13.8704
506	17.754	506	12.63
507	16.8095	507	15.1281
508	17.9307	508	12.7742
509	16.7214	509	13.7923
510	17.4162	510	13.5495
511	18.236	511	13.8881
512	16.9663	512	12.5916
513	17.9519	513	13.0245
514	16.9014	514	13.7172
515	17.7046	515	14.7672
516	16.5505	516	12.7673
517	17.3602	517	13.0383
518	17.4574	518	13.3847
519	17.1666	519	14.6072
520	15.5357	520	13.9465
521	17.5275	521	13.8279
522	18.8582	522	13.6956
523	17.8295	523	13.8035
524	16.9313	524	15.059
525	15.5405	525	14.5325
526	15.9254	526	12.9844
527	17.111	527	12.2204
528	16.823	528	12.9849
529	16.6787	529	13.675
530	18.2844	530	14.5967
531	16.3105	531	13.8945
532	17.0847	532	13.8087
533	17.2707	533	12.3003
534	17.1064	534	14.1421
535	17.3788	535	13.128
536	17.3607	536	13.5906
537	17.4915	537	12.9523
538	17.2806	538	14.0067
539	17.4663	539	14.4366
540	15.1154	540	12.884
541	18.1689	541	15.8724
542	18.0747	542	13.6004
543	19.0454	543	12.8267
544	16.9068	544	14.1911
545	16.3425	545	13.8629
546	16.7652	546	11.6762
547	17.9294	547	13.1738
548	17.4148	548	13.8567
549	17.5455	549	13.2646
550	16.8485	550	13.0168
551	17.9413	551	13.4585
552	17.4159	552	13.5667
553	18.3247	553	13.8753
554	16.4765	554	13.7885
555	17.5248	555	13.4028
556	16.1156	556	14.3525
557	17.1152	557	13.2753
558	16.5708	558	13.0937
559	16.3925	559	13.5022
560	17.666	560	14.0494
561	17.7542	561	13.4362
562	16.0316	562	12.8363
563	15.9169	563	13.1869
564	15.4122	564	15.6246
565	18.7066	565	12.8906
566	17.2886	566	14.4446
567	17.5326	567	15.175
568	16.9867	568	15.0109
569	16.9416	569	12.9554
570	17.15	570	13.121
571	16.488	571	12.6997
572	18.4428	572	12.8143
573	16.9545	573	14.7507
574	17.1201	574	13.3346
575	16.7563	575	13.5901
576	17.8762	576	13.7743
577	17.2642	577	12.8455
578	16.9079	578	13.6064
579	17.9484	579	14.708
580	18.6996	580	14.588
581	17.0646	581	13.5018
582	17.9665	582	12.1089
583	18.5526	583	12.148
584	17.4353	584	14.2901
585	17.7015	585	13.4119
586	17.0178	586	14.4531
587	18.2794	587	14.3346
588	17.3524	588	12.7286
589	15.3434	589	13.2352
590	17.9024	590	13.9138
591	17.3199	591	14.1945
592	16.8874	592	13.1321
593	17.0163	593	13.0418
594	17.441	594	14.0895
595	17.2656	595	13.0516
596	17.7124	596	12.8683
597	17.181	597	14.1899
598	16.564	598	13.6473
599	18.1457	599	14.8657
600	16.3233	600	14.833
601	17.9593	601	13.9457
602	17.6709	602	13.7182
603	17.9575	603	14.2089
604	17.6539	604	13.329
605	17.2848	605	13.2893
606	18.3977	606	14.2708
607	17.3785	607	13.7679
608	18.0275	608	15.3908
609	17.3152	609	13.223
610	16.9349	610	11.4687
611	16.3105	611	13.4277
612	17.5247	612	12.8196
613	17.1908	613	13.8871
614	17.1533	614	14.1829
615	18.79	615	13.3722
616	16.5628	616	12.3519
617	16.7844	617	12.5594
618	17.09	618	14.1128
619	16.6813	619	13.078
620	17.4199	620	13.3306
621	17.8611	621	14.2091
622	17.8635	622	15.2445
623	16.3103	623	13.616
624	16.7954	624	12.8253
625	17.5735	625	13.1541
626	17.3356	626	14.4432
627	17.9204	627	13.9095
628	17.4774	628	12.3656
629	17.0006	629	15.1358
630	16.5676	630	14.0122
631	17.7958	631	12.8017
632	17.0721	632	12.5476
633	18.0034	633	14.03
634	17.4152	634	13.0514
635	16.8378	635	14.264
636	17.5364	636	13.2459
637	17.809	637	13.8236
638	17.4319	638	15.1763
639	17.7144	639	14.3459
640	17.2352	640	14.7998
641	16.3157	641	14.2233
642	17.3838	642	13.5221
643	17.1316	643	13.7295
644	16.2256	644	13.8287
645	17.0643	645	12.6175
646	17.9082	646	13.7088
647	17.5479	647	13.9289
648	17.1935	648	13.4588
649	18.2074	649	14.0917
650	17.6275	650	13.758
651	16.7311	651	13.6686
652	15.9558	652	14.5146
653	16.5589	653	13.019
654	17.2462	654	13.7719
655	16.8	655	12.8483
656	16.5305	656	13.3588
657	16.3836	657	13.2446
658	17.089	658	13.1484
659	17.3933	659	12.8083
660	17.8501	660	14.2408
661	17.2095	661	13.4477
662	16.755	662	15.4306
663	17.1348	663	13.2366
664	18.6967	664	12.6473
665	17.8967	665	13.7011
666	17.4893	666	13.7524
667	17.0555	667	14.611
668	17.3512	668	12.8673
669	17.4983	669	12.6301
670	16.9854	670	13.9667
671	17.8379	671	14.0412
672	17.8653	672	13.9126
673	17.7896	673	13.6779
674	17.7937	674	12.9623
675	17.1774	675	14.4252
676	16.8226	676	13.746
677	17.4431	677	13.3646
678	17.718	678	13.8592
679	16.8446	679	14.433
680	17.4159	680	12.7708
681	17.4612	681	12.9458
682	16.3326	682	13.5021
683	17.9632	683	12.3671
684	17.9423	684	13.4075
685	17.4943	685	15.0339
686	16.5898	686	13.2021
687	16.7448	687	14.327
688	17.2391	688	13.3113
689	16.7565	689	14.0053
690	16.9415	690	13.282
691	17.6622	691	12.9602
692	16.2768	692	15.1643
693	17.0716	693	13.6618
694	16.7189	694	15.2111
695	17.0842	695	14.2488
696	17.113	696	13.9366
697	17.2595	697	14.1828
698	17.5934	698	13.1502
699	17.1772	699	12.7999
700	17.3469	700	13.8808
701	18.5541	701	15.0913
702	16.2255	702	13.6616
703	17.4208	703	13.324
704	18.2089	704	13.3679
705	16.4946	705	13.4568
706	17.7968	706	14.372
707	16.9165	707	13.3724
708	16.4416	708	13.8646
709	17.6934	709	13.3681
710	18.2488	710	13.1333
711	17.4021	711	13.516
712	17.185	712	12.8118
713	16.9561	713	13.7112
714	17.3213	714	14.5943
715	16.1992	715	15.1653
716	16.8615	716	12.4214
717	17.3739	717	12.9848
718	17.1025	718	13.864
719	16.2211	719	12.9081
720	16.8098	720	12.9612
721	16.7738	721	14.2534
722	17.5802	722	12.3364
723	17.3988	723	12.919
724	17.1696	724	12.1385
725	16.7839	725	13.0937
726	17.205	726	13.0689
727	17.4779	727	12.9595
728	15.9831	728	13.2258
729	17.4137	729	14.2856
730	18.4486	730	14.7396
731	17.0723	731	13.4311
732	17.972	732	13.1959
733	17.2431	733	13.3879
734	17.3616	734	12.8879
735	17.7713	735	12.3407
736	16.1315	736	13.9868
737	17.4383	737	13.041
738	17.6554	738	14.6906
739	18.4894	739	13.7338
740	18.2035	740	14.9267
741	17.2808	741	13.0929
742	17.9537	742	14.1037
743	17.7436	743	12.4515
744	16.8338	744	13.5637
745	17.4242	745	14.5006
746	16.7227	746	13.8164
747	17.581	747	11.651
748	17.3745	748	13.565
749	17.0167	749	12.818
750	17.0642	750	13.2547
751	17.4232	751	12.6796
752	16.1209	752	12.8051
753	18.051	753	13.4227
754	16.8158	754	12.8711
755	18.4554	755	12.1854
756	17.2969	756	14.8413
757	18.1931	757	13.9243
758	17.3289	758	13.4432
759	17.282	759	12.0843
760	17.674	760	14.2249
761	17.6525	761	13.1198
762	17.387	762	12.4779
763	17.5837	763	13.4301
764	16.9698	764	14.7939
765	17.2983	765	13.4752
766	17.5867	766	13.2562
767	16.6969	767	13.4082
768	16.7536	768	13.8035
769	16.635	769	14.556
770	16.2224	770	13.7955
771	16.3336	771	13.5897
772	17.5282	772	13.7707
773	16.8322	773	13.7602
774	17.5137	774	13.1268
775	17.3466	775	14.5149
776	17.185	776	13.6514
777	17.0538	777	15.11
778	17.6516	778	13.0576
779	18.2179	779	14.0104
780	16.7634	780	13.6104
781	17.5454	781	13.8595
782	16.9921	782	13.0329
783	16.7019	783	13.9468
784	18.3461	784	13.0229
785	17.2589	785	13.3759
786	17.7752	786	12.9483
787	17.8484	787	13.4419
788	18.0065	788	13.6714
789	17.5492	789	13.6983
790	17.7882	790	12.3459
791	17.4216	791	12.4647
792	17.0268	792	13.5599
793	16.8057	793	13.2907
794	16.8706	794	13.6388
795	17.7928	795	13.3053
796	17.7531	796	13.3414
797	17.389	797	15.5836
798	16.9518	798	13.9507
799	17.5569	799	14.0397
800	17.0024	800	13.3587
801	16.7164	801	13.3854
802	17.9773	802	15.2742
803	17.2706	803	13.4417
804	17.9872	804	13.2621
805	18.0211	805	14.0294
806	18.1306	806	13.931
807	16.9633	807	13.895
808	17.6077	808	13.3626
809	17.7042	809	13.2498
810	17.5882	810	13.2793
811	18.2789	811	15.5544
812	18.0511	812	13.3766
813	17.6264	813	14.2422
814	17.5253	814	13.3013
815	17.8942	815	14.3198
816	15.5904	816	13.6672
817	17.2342	817	12.8616
818	16.6234	818	14.7073
819	17.2164	819	13.3235
820	15.6705	820	14.0494
821	18.1342	821	13.3099
822	15.6593	822	12.9923
823	17.5877	823	13.0002
824	17.2521	824	12.232
825	16.1716	825	13.8566
826	17.5841	826	13.4397
827	15.4264	827	13.157
828	17.7909	828	12.6266
829	17.6034	829	13.6256
830	16.9665	830	13.3019
831	18.0061	831	14.4414
832	17.6345	832	14.1719
833	17.3493	833	14.893
834	17.2239	834	14.7263
835	16.6571	835	14.033
836	17.185	836	15.6849
837	17.3649	837	12.5817
838	17.5775	838	13.2232
839	17.3975	839	14.0518
840	17.6224	840	14.2734
841	17.1619	841	15.0604
842	18.5174	842	14.2199
843	17.3004	843	13.9713
844	16.0106	844	13.5061
845	15.8124	845	13.8129
846	16.8614	846	14.7556
847	17.6928	847	13.2248
848	17.6524	848	13.1652
849	17.8453	849	15.2135
850	17.7724	850	13.3914
851	17.4369	851	13.6071
852	17.7359	852	13.3333
853	17.3098	853	15.1612
854	17.2236	854	15.8753
855	17.3283	855	14.0759
856	16.946	856	12.1074
857	18.0388	857	14.6079
858	17.5445	858	14.6707
859	17.6053	859	13.2985
860	16.9755	860	14.3945
861	14.7115	861	12.2685
862	17.9614	862	13.0982
863	16.5656	863	13.2868
864	17.7201	864	13.2872
865	16.3017	865	13.3211
866	17.2788	866	13.1014
867	17.3467	867	13.2148
868	16.9981	868	14.0111
869	17.5289	869	13.988
870	17.9154	870	14.8229
871	17.9737	871	13.6012
872	18.0339	872	12.9968
873	17.7483	873	13.7715
874	17.5732	874	15.0086
875	17.5833	875	13.1759
876	18.4779	876	13.0302
877	17.8639	877	13.2373
878	18.0884	878	14.9935
879	17.7145	879	13.4883
880	17.6641	880	13.5041
881	17.0009	881	13.7741
882	17.3531	882	13.2096
883	18.1592	883	14.3334
884	17.4621	884	12.3878
885	17.9037	885	15.3774
886	18.0486	886	14.0566
887	15.8638	887	13.7367
888	18.656	888	15.135
889	16.5363	889	12.3669
890	18.1146	890	13.4108
891	17.956	891	13.9127
892	17.0452	892	13.1742
893	16.8393	893	13.287
894	17.182	894	13.995
895	16.4496	895	14.2744
896	17.1424	896	13.1761
897	17.3182	897	14.7836
898	17.341	898	13.2866
899	17.0099	899	14.4882
900	17.1638	900	13.3576
901	17.3019	901	13.4021
902	17.3008	902	13.6556
903	18.774	903	14.9075
904	16.7201	904	15.2271
905	17.4719	905	12.7787
906	17.1888	906	13.475
907	17.5451	907	15.2229
908	17.8783	908	13.4914
909	17.3884	909	13.2748
910	17.6525	910	14.5129
911	16.89	911	13.8093
912	17.3859	912	13.4278
913	16.9366	913	12.7943
914	17.7714	914	13.3695
915	17.0043	915	12.4394
916	16.4882	916	15.4587
917	17.9607	917	12.7064
918	18.1976	918	14.0839
919	17.3928	919	13.5031
920	16.7294	920	13.2907
921	17.1885	921	15.4394
922	16.4916	922	14.605
923	16.4575	923	12.5893
924	16.9395	924	15.3217
925	16.3763	925	13.2373
926	16.1491	926	14.5412
927	19.0019	927	15.2794
928	17.5748	928	12.226
929	17.4028	929	14.4981
930	17.1461	930	13.0584
931	17.6474	931	11.9078
932	16.839	932	13.1598
933	17.3827	933	13.052
934	17.4658	934	13.5197
935	17.8977	935	13.6823
936	17.09	936	14.552
937	16.5842	937	12.9245
938	16.752	938	13.2735
939	17.4291	939	13.4788
940	15.6622	940	15.3379
941	17.6151	941	14.4365
942	16.8694	942	14.0504
943	16.7071	943	15.1784
944	16.8408	944	13.1808
945	16.9961	945	13.4724
946	16.3706	946	13.6117
947	17.6501	947	13.8233
948	17.1598	948	14.5332
949	16.9222	949	14.9282
950	17.6314	950	14.8956
951	17.3757	951	14.8384
952	17.492	952	13.2146
953	17.6576	953	13.1631
954	17.4849	954	14.2475
955	17.6572	955	13.0775
956	17.0232	956	13.4644
957	16.5529	957	12.7566
958	16.9798	958	15.6719
959	17.2685	959	13.0147
960	16.5837	960	12.5433
961	17.928	961	13.8229
962	17.3137	962	14.9141
963	17.3925	963	14.5105
964	17.1831	964	13.7408
965	16.9495	965	14.9263
966	17.5296	966	13.8527
967	17.3474	967	14.3721
968	18.1961	968	13.1065
969	17.4474	969	13.0001
970	17.8546	970	13.4124
971	16.6488	971	13.0003
972	16.1924	972	13.6963
973	16.9959	973	12.5874
974	16.7965	974	14.2959
975	16.9539	975	13.2185
976	17.566	976	13.0953
977	16.5726	977	14.3845
978	16.8192	978	14.2697
979	17.3815	979	14.3845
980	18.008	980	14.339
981	17.8909	981	14.3865
982	17.2771	982	14.4823
983	17.2032	983	14.5057
984	17.64	984	14.3205
985	18.339	985	14.2462
986	18.1882	986	14.2394
987	17.848	987	14.1015
988	17.1509	988	13.8641
989	17.1848	989	14.9494
990	17.6416	990	17.1459
991	16.651	991	14.2879
992	17.5294	992	14.2763
993	17.3696	993	13.7102
994	16.1626	994	15.3194
995	16.9421	995	14.1134
996	17.815	996	14.0459
997	17.081	997	15.1666
998	17.3955	998	14.6916
999	17.7306	999	14.4727
1000	17.3152	1000	13.6789
1001	17.9975	1001	13.4282
1002	17.023	1002	15.3492
1003	17.9041	1003	15.4428
1004	17.1053	1004	12.8224
1005	16.7503	1005	15.8854
1006	17.42	1006	14.8308
1007	18.4219	1007	14.5465
1008	16.7107	1008	13.9876
1009	17.2303	1009	13.8907
1010	17.2622	1010	14.6524
1011	17.1838	1011	13.8875
1012	18.1711	1012	14.9257
1013	17.0972	1013	15.6839
1014	17.2138	1014	15.109
1015	16.9893	1015	15.4001
1016	16.8055	1016	15.0644
1017	17.9543	1017	15.0644
1018	17.591	1018	14.376
1019	17.1911	1019	15.8485
1020	17.7557	1020	14.7713
1021	17.8288	1021	15.1202
1022	16.9514	1022	14.2848
1023	17.3676	1023	14.2848
1024	17.0929	1024	14.2848
1025	17.5163	1025	14.3524
1026	17.4221	1026	15.5096
1027	17.853	1027	15.5096
1028	17.2586	1028	15.4092
1029	16.9921	1029	14.2372
1030	16.981	1030	14.2372
1031	16.2463	1031	15.8485
1032	17.7185	1032	13.8907
1033	18.2192	1033	13.4915
1034	16.3119	1034	15.8854
1035	17.0572	1035	13.9401
1036	15.9443	1036	14.5735
1037	16.9703	1037	16.0826
1038	17.71	1038	16.7317
1039	16.7198	1039	15.3485
1040	18.5873	1040	14.9813
1041	16.5948	1041	15.5341
1042	17.0687	1042	15.2071
1043	17.7539	1043	15.8485
1044	16.7097	1044	14.0791
1045	16.829	1045	13.8781
1046	17.4166	1046	13.6126
1047	16.8548	1047	13.8781
1048	17.0224	1048	15.0126
1049	17.8937	1049	14.8148
1050	17.2581	1050	15.8885
1051	17.1934	1051	13.7888
1052	16.9084	1052	15.5331
1053	17.5091	1053	15.694
1054	16.5463	1054	15.1747
1055	17.2464	1055	15.8485
1056	17.3953	1056	14.0791
1057	17.5298	1057	14.0791
1058	16.0435	1058	14.0716
1059	16.8453	1059	14.0974
1060	17.2021	1060	16.2489
1061	16.3459	1061	14.3918
1062	16.3196	1062	4.8319
1063	16.9584	1063	10.6144
1064	17.9197	1064	4.27057
1065	16.7282	1065	14.1562
1066	17.0241	1066	3.69398
1067	17.3666	1067	14.5465
1068	17.266	1068	13.3985
1069	16.6582	1069	13.9876
1070	16.517	1070	13.7834
1071	17.0755	1071	14.5164
1072	16.9633	1072	15.2394
1073	17.4438	1073	14.4665
1074	16.4333	1074	14.4291
1075	17.3101	1075	14.5659
1076	17.8539	1076	15.9866
1077	17.3246	1077	14.5312
1078	16.5326	1078	13.0946
1079	16.4427	1079	14.6467
1080	16.1183	1080	15.0937
1081	16.9381	1081	15.4846
1082	17.953	1082	13.9222
1083	16.5776	1083	16.0743
1084	17.1015	1084	16.0007
1085	16.039	1085	16.3645
1086	16.9663	1086	15.0064
1087	16.9814	1087	16.7875
1088	18.8116	1088	15.4569
1089	17.3535	1089	14.2121
1090	18.2826	1090	14.4752
1091	17.2271	1091	14.6594
1092	17.0121	1092	14.2182
1093	17.4875	1093	14.8777
1094	16.9529	1094	12.9359
1095	16.9643	1095	16.8092
1096	18.3902	1096	15.8379
1097	17.5019	1097	14.4439
1098	16.6036	1098	14.6993
1099	18.1855	1099	14.6308
1100	17.7458	1100	14.6711
1101	18.077	1101	13.5387
1102	17.6809	1102	14.5673
1103	17.778	1103	14.9497
1104	17.3766	1104	14.2422
1105	16.6717	1105	15.8594
1106	16.7896	1106	13.4696
1107	17.0863	1107	14.4465
1108	18.0952	1108	14.7616
1109	16.5118	1109	14.7851
1110	16.5705	1110	13.9568
1111	17.2291	1111	14.7341
1112	17.6895	1112	16.0279
1113	17.2737	1113	16.7803
1114	16.159	1114	15.3163
1115	18.1449	1115	14.0303
1116	16.6029	1116	14.0672
1117	17.6693	1117	15.8774
1118	17.8384	1118	14.8624
1119	16.4543	1119	13.5245
1120	17.7849	1120	15.0367
1121	17.3823	1121	16.5943
1122	17.1303	1122	15.6842
1123	17.8187	1123	14.542
1124	16.9852	1124	14.2173
1125	17.3939	1125	16.3939
1126	17.2357	1126	16.1878
1127	17.0713	1127	14.9515
1128	17.2788	1128	14.103
1129	17.2695	1129	15.782
1130	16.0639	1130	14.936
1131	17.4735	1131	15.6484
1132	17.0418	1132	14.0328
1133	17.3006	1133	15.626
1134	17.7508	1134	15.0764
1135	18.0606	1135	15.3736
1136	17.3753	1136	15.1475
1137	17.8584	1137	15.5245
1138	17.8137	1138	14.1693
1139	17.4186	1139	15.8391
1140	17.2873	1140	13.904
1141	17.617	1141	15.5382
1142	17.5304	1142	15.9035
1143	16.943	1143	14.7755
1144	17.1799	1144	13.7238
1145	16.3717	1145	14.5241
1146	17.1933	1146	16.7473
1147	16.599	1147	15.2349
1148	15.9569	1148	16.08
1149	17.0614	1149	14.3405
1150	16.8153	1150	15.2404
1151	16.0836	1151	14.2702
1152	17.3427	1152	15.7123
1153	16.3676	1153	8.3619
1154	18.3382	1154	6.02648
1155	17.4781	1155	5.76175
1156	18.2521	1156	8.48093
1157	17.6042	1157	5.57462
1158	16.9866	1158	8.77202
1159	16.8834	1159	8.5273
1160	18.5387	1160	6.61265
1161	17.1577	1161	6.15967
1162	16.1832	1162	9.18453
1163	17.6946	1163	8.38343
1164	17.2426	1164	9.5164
1165	19.3277	1165	6.7246
1166	17.0056	1166	8.04438
1167	16.8441	1167	7.13191
1168	17.3622	1168	6.79863
1169	17.7199	1169	6.8147
1170	18.5116	1170	6.67408
1171	17.8906	1171	9.41713
1172	18.1758	1172	10.7608
1173	17.0855	1173	7.41277
1174	16.9483	1174	7.49923
1175	17.6118	1175	6.72599
1176	16.5357	1176	6.50601
1177	16.2046	1177	7.47021
1178	17.9743	1178	6.88885
1179	17.1611	1179	7.73569
1180	17.4954	1180	6.48613
1181	18.546	1181	5.16076
1182	17.0506	1182	7.00719
1183	17.9739	1183	6.81793
1184	16.8001	1184	9.25288
1185	17.4413	1185	7.62918
1186	16.1976	1186	6.42374
1187	17.2959	1187	8.46537
1188	17.5973	1188	7.06561
1189	18.0591	1189	5.50178
1190	17.6988	1190	8.14029
1191	18.1818	1191	8.12409
1192	16.3568	1192	5.58892
1193	16.4476	1193	7.8258
1194	16.8435	1194	8.33576
1195	17.2176	1195	8.03228
1196	16.7212	1196	6.38796
1197	17.658	1197	7.14835
1198	15.7434	1198	7.10839
1199	17.1849	1199	7.99836
1200	18.0085	1200	8.34198
1201	16.9448	1201	6.22463
1202	16.6361	1202	8.31483
1203	16.8836	1203	6.01828
1204	16.7241	1204	6.91844
1205	16.6727	1205	6.63433
1206	17.4074	1206	7.73436
1207	16.7124	1207	8.85512
1208	17.5976	1208	7.96901
1209	17.2085	1209	8.07897
1210	17.924	1210	5.91301
1211	17.8958	1211	7.37881
1212	17.3074	1212	6.1278
1213	18.2491	1213	7.49015
1214	17.4586	1214	8.01027
1215	16.9563	1215	9.43387
1216	18.0153	1216	6.48077
1217	18.0192	1217	9.3026
1218	17.1905	1218	6.43125
1219	17.2875	1219	7.56927
1220	17.5769	1220	5.78947
1221	17.608	1221	7.7072
1222	17.5746	1222	6.71648
1223	17.6882	1223	7.81139
1224	17.9296	1224	7.62393
1225	17.1475	1225	7.79389
1226	17.213	1226	7.07977
1227	16.6847	1227	6.55631
1228	17.4485	1228	6.22676
1229	17.5232	1229	8.30743
1230	17.23	1230	6.4567
1231	17.2206	1231	6.7212
1232	17.5314	1232	7.78787
1233	16.2794	1233	9.6225
1234	17.7001	1234	6.69653
1235	18.0027	1235	6.68733
1236	17.6939	1236	8.12828
1237	17.0439	1237	6.95113
1238	17.2199	1238	6.70644
1239	17.2774	1239	6.38158
1240	17.5077	1240	7.50182
1241	17.0473	1241	7.51747
1242	16.7517	1242	6.75839
1243	17.0881	1243	6.78161
1244	16.4216	1244	7.21174
1245	16.4172	1245	7.96093
1246	15.5285	1246	7.03889
1247	16.8553	1247	8.22912
1248	17.1966	1248	7.16597
1249	17.7036	1249	7.83267
1250	17.2438	1250	9.35648
1251	17.1847	1251	7.08605
1252	16.987	1252	7.29392
1253	17.4834	1253	3.92699
1254	16.1642	1254	3.79102
1255	16.7497	1255	3.5493
1256	16.7728	1256	4.03958
1257	17.199	1257	2.8136
1258	17.0209	1258	2.84575
1259	17.5174	1259	3.94776
1260	17.6239	1260	2.52483
1261	16.5488	1261	4.58341
1262	17.5811	1262	3.1241
1263	16.9971	1263	3.71711
1264	16.981	1264	2.98508
1265	16.4828	1265	3.39221
1266	17.2638	1266	3.23165
1267	17.4253	1267	3.4009
1268	16.0064	1268	3.13357
1269	15.7685	1269	2.99641
1270	18.1782	1270	2.97664
1271	17.3526	1271	2.65434
1272	17.1536	1272	3.27134
1273	17.6799	1273	6.96744
1274	16.3494	1274	9.46827
1275	17.1841	1275	5.85509
1276	17.7516	1276	7.87594
1277	16.5582	1277	7.01505
1278	17.7374	1278	8.57073
1279	17.1387	1279	8.1421
1280	16.1364	1280	7.23749
1281	18.415	1281	7.23786
1282	17.0823	1282	6.73373
1283	17.8169	1283	7.97671
1284	18.5618	1284	6.46232
1285	17.4855	1285	9.15568
1286	15.8388	1286	5.20304
1287	17.2624	1287	7.92439
1288	17.0718	1288	5.43188
1289	18.0731	1289	7.95954
1290	16.9393	1290	6.92074
1291	18.4933	1291	8.86781
1292	16.1382	1292	9.39128
1293	16.9536	1293	13.6564
1294	16.1761	1294	14.827
1295	17.3766	1295	14.5503
1296	16.5418	1296	14.917
1297	16.1553	1297	13.3398
1298	16.8491	1298	14.8707
1299	17.6199	1299	15.3186
1300	17.5711	1300	14.7714
1301	17.0927	1301	14.5369
1302	18.415	1302	15.1061
1303	17.0622	1303	13.929
1304	17.4483	1304	14.6608
1305	16.7654	1305	14.7012
1306	16.3274	1306	15.7067
1307	16.8047	1307	14.2507
1308	17.0032	1308	16.5011
1309	17.0285	1309	14.6273
1310	16.5897	1310	14.6441
1311	18.162	1311	13.6103
1312	17.3454	1312	14.2354
1313	16.3868	1313	14.3601
1314	17.1966	1314	13.8042
1315	18.0077	1315	14.3837
1316	17.7097	1316	14.4787
1317	16.7242	1317	14.9327
1318	17.1472	1318	15.6479
1319	18.1731	1319	13.9941
1320	18.0503	1320	15.3536
1321	17.0813	1321	15.6581
1322	16.77	1322	14.2145
1323	17.3748	1323	15.5812
1324	16.6867	1324	13.7047
1325	16.8024	1325	13.9232
1326	17.7344	1326	15.7287
1327	16.9528	1327	15.1546
1328	17.6196	1328	15.9059
1329	18.1275	1329	14.4651
1330	17.9879	1330	14.4333
1331	17.0178	1331	14.4791
1332	17.7305	1332	15.4366
1333	17.668	1333	14.103
1334	18.7027	1334	13.981
1335	17.897	1335	15.033
1336	16.1102	1336	15.3299
1337	17.021	1337	13.8505
1338	16.7227	1338	14.369
1339	15.8215	1339	14.7172
1340	17.0113	1340	14.8928
1341	17.1548	1341	14.7878
1342	17.8935	1342	14.6935
1343	15.8372	1343	13.2547
1344	15.3584	1344	13.7525
1345	17.8251	1345	14.5851
1346	18.2265	1346	14.1209
1347	17.1622	1347	14.8527
1348	17.9212	1348	13.6403
1349	17.0339	1349	13.8058
1350	17.6852	1350	15.9661
1351	17.254	1351	15.5717
1352	17.7912	1352	13.774
1353	17.0325	1353	13.8453
1354	18.3212	1354	14.1763
1355	17.081	1355	15.4401
1356	16.7815	1356	13.9435
1357	15.8596	1357	14.5336
1358	17.7063	1358	14.7747
1359	18.5902	1359	14.7985
1360	16.1583	1360	13.6665
1361	16.3241	1361	15.1297
1362	17.8136	1362	14.6913
1363	16.5254	1363	15.9531
1364	16.7606	1364	16.1973
1365	17.185	1365	15.3881
1366	17.5177	1366	15.1724
1367	18.1894	1367	13.0039
1368	17.3466	1368	15.7788
1369	16.9441	1369	14.9608
1370	16.7871	1370	15.225
1371	17.1989	1371	14.2321
1372	16.8676	1372	15.2351
1373	17.6827	1373	15.8935
1374	17.7483	1374	15.0427
1375	17.2524	1375	15.0789
1376	17.546	1376	14.018
1377	17.8998	1377	14.5171
1378	16.841	1378	13.5428
1379	16.4423	1379	14.673
1380	16.9724	1380	15.5012
1381	15.9024	1381	14.1256
1382	18.1018	1382	14.5866
1383	16.3072	1383	14.0385
1384	17.4271	1384	14.4987
1385	17.3677	1385	14.126
1386	16.7568	1386	14.6022
1387	18.1036	1387	14.3682
1388	18.0145	1388	13.4918
1389	17.4431	1389	14.6142
1390	16.759	1390	14.8695
1391	17.4435	1391	14.4715
1392	17.1776	1392	15.5317
1393	17.3936	1393	14.2674
1394	18.7853	1394	14.4317
1395	17.6863	1395	13.0965
1396	17.9195	1396	15.4781
1397	16.6733	1397	16.2196
1398	16.894	1398	13.9701
1399	17.4312	1399	14.9916
1400	17.9371	1400	13.9179
1401	17.9671	1401	14.8922
1402	17.2508	1402	15.0507
1403	18.2293	1403	13.6646
1404	17.0922	1404	14.7956
1405	17.2855	1405	14.5095
1406	16.2628	1406	14.6442
1407	17.4813	1407	14.3837
1408	18.9815	1408	14.3938
1409	16.6275	1409	15.2413
1410	17.0147	1410	14.6074
1411	16.8767	1411	15.7097
1412	16.8837	1412	15.2672
1413	16.5569	1413	16.4456
1414	16.7698	1414	13.5778
1415	17.475	1415	15.5024
1416	16.8247	1416	14.3283
1417	17.1703	1417	14.9737
1418	18.4218	1418	15.3837
1419	17.7445	1419	14.6103
1420	16.4559	1420	14.7362
1421	17.1349	1421	14.6748
1422	18.8213	1422	14.8081
1423	16.1296	1423	14.3892
1424	17.1919	1424	14.3815
1425	17.8162	1425	14.122
1426	17.4583	1426	15.276
1427	17.9547	1427	14.3533
1428	16.1494	1428	14.6764
1429	16.3631	1429	15.4618
1430	15.6635	1430	16.1403
1431	19.2223	1431	14.8187
1432	17.5403	1432	14.5101
1433	17.4658	1433	14.3398
1434	17.3885	1434	16.0868
1435	17.8045	1435	13.8129
1436	16.9488	1436	15.3388
1437	17.9845	1437	14.5709
1438	17.4366	1438	15.0326
1439	16.9852	1439	14.3335
1440	17.5744	1440	15.5412
1441	17.1043	1441	15.7379
1442	17.3902	1442	15.805
1443	17.11	1443	14.5532
1444	16.8582	1444	14.2058
1445	16.8768	1445	14.1823
1446	16.9147	1446	15.0423
1447	16.4079	1447	13.6754
1448	17.5726	1448	14.2886
1449	17.7796	1449	14.8942
1450	17.5519	1450	15.3056
1451	16.8068	1451	14.5074
1452	18.5366	1452	14.3937
1453	17.0834	1453	14.187
1454	18.1666	1454	15.6323
1455	15.7982	1455	14.0834
1456	16.4537	1456	15.1363
1457	15.767	1457	14.1105
1458	17.0733	1458	13.9099
1459	17.214	1459	15.6809
1460	16.8076	1460	13.7297
1461	16.5984	1461	14.702
1462	17.1872	1462	15.5617
1463	17.1712	1463	13.9452
1464	17.1556	1464	15.6892
1465	16.8817	1465	14.4283
1466	16.3871	1466	13.7658
1467	16.8174	1467	14.38
1468	18.5655	1468	15.1177
1469	17.9257	1469	14.6483
1470	17.7857	1470	14.5464
1471	16.9574	1471	14.7995
1472	17.1247	1472	13.8203
1473	17.557	1473	14.2727
1474	16.7782	1474	14.0651
1475	16.6114	1475	14.4694
1476	17.4379	1476	14.893
1477	17.1605	1477	16.7823
1478	16.6921	1478	13.2282
1479	17.2556	1479	15.0906
1480	17.0677	1480	14.6841
1481	18.4692	1481	15.1193
1482	17.9844	1482	16.0082
1483	16.6545	1483	14.1486
1484	17.1912	1484	15.0838
1485	16.69	1485	13.7795
1486	17.7804	1486	15.4569
1487	17.345	1487	13.9798
1488	17.2593	1488	14.7176
1489	17.6889	1489	15.2834
1490	17.4048	1490	15.5356
1491	16.8785	1491	14.4674
1492	16.8659	1492	15.455
1493	18.3597	1493	14.9583
1494	17.2031	1494	14.5147
1495	17.2408	1495	14.6887
1496	16.4199	1496	14.5196
1497	15.9324	1497	16.3595
1498	16.2387	1498	14.205
1499	17.2465	1499	14.5533
1500	17.3353	1500	15.1376
1501	16.8366	1501	14.5421
1502	17.9442	1502	14.588
1503	17.0998	1503	15.1764
1504	16.5692	1504	14.8547
1505	18.0914	1505	14.5517
1506	16.6313	1506	13.9004
1507	18.1436	1507	15.2651
1508	16.2407	1508	15.0041
1509	17.9538	1509	14.6259
1510	17.0893	1510	14.7539
1511	17.3727	1511	15.0674
1512	17.7967	1512	14.1672
1513	17.456	1513	15.1598
1514	16.9097	1514	15.4643
1515	16.1181	1515	14.2073
1516	17.2135	1516	14.4163
1517	17.6289	1517	15.187
1518	17.5432	1518	14.5788
1519	15.9267	1519	14.5662
1520	17.3924	1520	14.9577
1521	17.4667	1521	14.5961
1522	14.9167	1522	14.1801
1523	17.1775	1523	13.4632
1524	15.4741	1524	15.545
1525	16.4194	1525	14.7854
1526	17.3789	1526	13.6232
1527	15.5556	1527	15.2736
1528	17.2769	1528	14.6999
1529	17.4824	1529	14.8808
1530	17.3253	1530	14.6298
1531	16.9521	1531	15.6067
1532	18.2957	1532	14.3398
1533	17.4595	1533	14.7852
1534	17.8034	1534	14.6686
1535	17.5166	1535	14.1455
1536	16.8104	1536	13.9128
1537	16.9953	1537	16.242
1538	17.6781	1538	14.418
1539	17.3924	1539	15.1614
1540	18.4301	1540	15.0808
1541	16.9277	1541	14.8751
1542	16.027	1542	14.8278
1543	17.5829	1543	16.6346
1544	17.376	1544	14.7994
1545	16.9958	1545	14.2285
1546	16.5331	1546	15.2893
1547	17.7868	1547	13.7538
1548	17.1727	1548	15.2698
1549	17.5877	1549	14.5505
1550	17.3562	1550	14.4096
1551	16.5916	1551	14.9142
1552	17.579	1552	14.141
1553	16.1505	1553	14.8649
1554	16.5131	1554	14.3792
1555	17.4572	1555	13.8039
1556	17.4018	1556	14.1385
1557	17.5322	1557	15.7284
1558	16.9523	1558	14.9999
1559	16.5121	1559	15.022
1560	17.1676	1560	15.2973
1561	17.5177	1561	14.6151
1562	17.3039	1562	15.1458
1563	17.4266	1563	13.9418
1564	17.074	1564	13.8691
1565	16.7496	1565	14.7114
1566	14.4856	1566	14.264
1567	17.636	1567	14.6221
1568	16.53	1568	15.8055
1569	16.7998	1569	14.681
1570	17.3248	1570	14.998
1571	17.1551	1571	14.8072
1572	16.6763	1572	14.7629
1573	17.1747	1573	15.7383
1574	17.6803	1574	14.1461
1575	17.1477	1575	13.9961
1576	17.2378	1576	14.5074
1577	17.8257	1577	15.274
1578	16.1071	1578	15.5425
1579	17.0824	1579	14.7855
1580	17.6369	1580	12.6016
1581	18.219	1581	13.5131
1582	17.0753	1582	15.2886
1583	17.9744	1583	14.9172
1584	18.0435	1584	14.3585
1585	17.7516	1585	15.2417
1586	18.2945	1586	15.1022
1587	18.5099	1587	13.7987
1588	17.6263	1588	13.5427
1589	18.0596	1589	15.0857
1590	18.3771	1590	15.1455
1591	17.0721	1591	13.2686
1592	17.5773	1592	14.7202
1593	17.5162	1593	15.7168
1594	16.949	1594	14.0075
1595	17.4096	1595	14.0033
1596	17.1256	1596	15.1532
1597	17.0693	1597	14.7486
1598	18.0534	1598	14.8129
1599	17.2172	1599	15.1085
1600	16.656	1600	15.0589
1601	16.9969	1601	15.0199
1602	17.1662	1602	15.1065
1603	17.193	1603	13.9874
1604	17.0681	1604	13.5089
1605	17.8535	1605	15.3917
1606	17.6558	1606	14.2055
1607	16.4654	1607	14.8347
1608	17.3287	1608	15.424
1609	18.525	1609	15.0404
1610	17.28	1610	15.846
1611	16.9374	1611	14.3429
1612	16.7182	1612	13.9396
1613	17.2797	1613	16.6514
1614	17.4551	1614	15.8424
1615	17.2351	1615	14.7413
1616	17.3312	1616	15.6362
1617	17.0998	1617	14.6917
1618	16.4476	1618	15.2235
1619	15.3246	1619	14.7818
1620	17.6658	1620	15.1202
1621	17.1866	1621	14.7256
1622	18.1218	1622	14.0348
1623	16.8064	1623	14.6998
1624	17.4191	1624	14.7682
1625	16.5355	1625	13.8927
1626	17.1293	1626	15.4038
1627	17.8763	1627	14.1764
1628	16.8398	1628	13.1907
1629	17.0477	1629	13.9983
1630	17.2456	1630	14.1188
1631	17.8558	1631	16.5994
1632	16.1498	1632	14.2628
1633	18.3975	1633	14.3865
1634	16.7205	1634	15.5936
1635	16.3925	1635	15.5441
1636	17.1733	1636	15.4354
1637	16.2587	1637	14.6013
1638	17.1182	1638	13.4209
1639	17.328	1639	14.494
1640	17.4831	1640	13.8742
1641	16.8698	1641	14.7041
1642	17.1334	1642	15.5738
1643	17.7343	1643	14.8709
1644	16.6796	1644	14.8171
1645	16.9594	1645	14.4327
1646	16.0381	1646	15.4717
1647	18.4707	1647	14.1385
1648	17.3658	1648	15.3527
1649	16.9989	1649	14.355
1650	17.9858	1650	14.2409
1651	16.9348	1651	14.7175
1652	17.1722	1652	13.8655
1653	17.7733	1653	14.4283
1654	17.3074	1654	15.5785
1655	17.353	1655	14.2562
1656	17.9252	1656	14.7419
1657	17.9257	1657	13.543
1658	16.4516	1658	13.8909
1659	17.498	1659	14.4316
1660	17.0724	1660	14.8005
1661	17.2816	1661	13.8757
1662	17.7102	1662	14.6045
1663	17.0175	1663	14.7851
1664	17.2612	1664	14.5317
1665	18.3053	1665	14.9681
1666	16.6063	1666	12.6817
1667	16.4681	1667	14.3883
1668	17.0063	1668	14.5703
1669	18.1061	1669	15.1023
1670	16.6111	1670	14.5597
1671	17.5305	1671	15.3101
1672	17.117	1672	15.0619
1673	17.0706	1673	16.1729
1674	17.6934	1674	15.0019
1675	17.5123	1675	14.4728
1676	17.9801	1676	14.4944
1677	17.4291	1677	15.2474
1678	18.2054	1678	15.1519
1679	17.3526	1679	13.6664
1680	17.9873	1680	13.5538
1681	18.1507	1681	15.3184
1682	17.7242	1682	14.4537
1683	17.2935	1683	13.2979
1684	17.8835	1684	15.1001
1685	17.2268	1685	14.4116
1686	16.7856	1686	14.734
1687	17.0724	1687	14.3277
1688	17.1502	1688	15.832
1689	17.532	1689	14.188
1690	17.7379	1690	15.3798
1691	17.1329	1691	15.0374
1692	17.6796	1692	13.734
1693	17.7201	1693	14.835
1694	16.4237	1694	13.4374
1695	17.9208	1695	15.1011
1696	17.4116	1696	16.3349
1697	16.404	1697	14.2676
1698	17.129	1698	13.4559
1699	17.6626	1699	15.1289
1700	17.7039	1700	14.8586
1701	17.7174	1701	14.0208
1702	17.0698	1702	14.6607
1703	17.7898	1703	14.8987
1704	18.0958	1704	14.2732
1705	17.1465	1705	14.6472
1706	16.1972	1706	14.8429
1707	18.2645	1707	13.6011
1708	17.8007	1708	15.776
1709	16.5747	1709	14.0465
1710	17.597	1710	15.4999
1711	16.9293	1711	14.1564
1712	17.7118	1712	15.4262
1713	16.6006	1713	14.658
1714	17.0968	1714	16.7195
1715	18.0103	1715	14.528
1716	17.2297	1716	14.0054
1717	17.2559	1717	14.5894
1718	17.5402	1718	14.5597
1719	15.6623	1719	14.7105
1720	16.3387	1720	14.0867
1721	17.2519	1721	13.7241
1722	16.8207	1722	15.1316
1723	17.1758	1723	14.6017
1724	16.3705	1724	14.7187
1725	16.0283	1725	15.1563
1726	17.1153	1726	13.722
1727	17.4461	1727	16.0134
1728	17.3739	1728	13.7441
1729	17.4229	1729	14.5326
1730	17.4636	1730	15.3767
1731	17.6513	1731	14.1622
1732	16.7529	1732	14.8787
1733	17.366	1733	14.8757
1734	17.4298	1734	14.5024
1735	17.2994	1735	16.4817
1736	17.1157	1736	16.8781
1737	16.8095	1737	14.6838
1738	18.2787	1738	15.7248
1739	17.4861	1739	13.94
1740	17.5388	1740	15.3151
1741	18.0592	1741	14.2404
1742	17.8567	1742	14.9872
1743	17.0862	1743	15.6507
1744	17.5595	1744	14.416
1745	16.7885	1745	15.1765
1746	15.865	1746	15.9061
1747	17.8262	1747	17.2254
1748	16.5455	1748	15.1639
1749	16.7785	1749	15.509
1750	17.7922	1750	15.2544
1751	18.1412	1751	14.2759
1752	17.4478	1752	13.8461
1753	17.9245	1753	14.7254
1754	16.5545	1754	15.1843
1755	16.7736	1755	15.3103
1756	16.8667	1756	14.5705
1757	16.9457	1757	15.4044
1758	17.0067	1758	15.3082
1759	17.1017	1759	16.0876
1760	17.6983	1760	13.8005
1761	17.1953	1761	15.8157
1762	17.5718	1762	14.0024
1763	16.6965	1763	15.7403
1764	16.4633	1764	14.1945
1765	17.5889	1765	15.305
1766	17.5413	1766	14.5571
1767	17.7647	1767	13.6444
1768	17.5332	1768	13.8798
1769	17.2889	1769	14.6992
1770	16.5831	1770	14.3894
1771	18.732	1771	13.7475
1772	17.1229	1772	15.1459
1773	17.772	1773	14.4763
1774	16.208	1774	14.4463
1775	17.9882	1775	14.0847
1776	17.8593	1776	14.4211
1777	17.2616	1777	13.6743
1778	17.0721	1778	13.9273
1779	17.6111	1779	14.6228
1780	16.6818	1780	15.0365
1781	16.3208	1781	14.4105
1782	16.7611	1782	13.9301
1783	17.5142	1783	15.3591
1784	18.1828	1784	15.4139
1785	18.087	1785	15.2596
1786	17.9104	1786	13.9563
1787	17.4032	1787	14.9929
1788	16.3515	1788	13.8436
1789	16.8284	1789	14.1549
1790	15.3719	1790	15.2788
1791	17.6746	1791	13.9808
1792	18.3996	1792	14.2805
1793	18.2661	1793	14.9976
1794	17.5242	1794	14.4705
1795	17.138	1795	15.0558
1796	16.7186	1796	14.7551
1797	16.7138	1797	14.3824
1798	17.1594	1798	14.9322
1799	16.5241	1799	14.6522
1800	16.3076	1800	14.5749
1801	17.2325	1801	15.6401
1802	17.005	1802	13.8765
1803	17.7926	1803	15.349
1804	17.708	1804	14.8928
1805	16.802	1805	14.4754
1806	17.3786	1806	14.3135
1807	17.2597	1807	13.8676
1808	18.569	1808	16.2067
1809	17.2512	1809	14.8021
1810	17.4481	1810	14.9578
1811	16.8112	1811	13.4423
1812	16.7614	1812	14.9455
1813	16.7139	1813	13.4791
1814	17.6227	1814	14.7608
1815	17.6344	1815	14.3304
1816	17.4949	1816	14.2619
1817	17.1334	1817	14.695
1818	18.0691	1818	14.4077
1819	16.5136	1819	14.2401
1820	17.3745	1820	15.9929
1821	17.8099	1821	14.3543
1822	18.1645	1822	13.7752
1823	17.8608	1823	14.2318
1824	15.9933	1824	14.4388
1825	17.6031	1825	14.1951
1826	17.8069	1826	15.0297
1827	17.326	1827	14.2167
1828	16.5977	1828	15.0378
1829	16.8987	1829	14.5671
1830	16.6179	1830	14.9328
1831	17.2342	1831	13.2341
1832	16.7032	1832	15.4957
1833	17.3796	1833	15.8216
1834	16.9526	1834	13.905
1835	16.6805	1835	16.524
1836	17.4208	1836	13.2941
1837	17.5996	1837	16.2047
1838	16.9626	1838	15.1295
1839	17.5172	1839	14.7017
1840	17.4385	1840	14.0125
1841	17.0953	1841	15.6023
1842	17.5728	1842	14.4295
1843	18.4218	1843	15.3831
1844	17.7411	1844	15.1476
1845	16.7575	1845	15.2215
1846	17.9026	1846	14.5002
1847	17.2033	1847	14.0161
1848	17.8866	1848	15.0258
1849	17.182	1849	14.656
1850	17.7522	1850	15.3792
1851	17.674	1851	15.2457
1852	17.1727	1852	14.0904
1853	17.4698	1853	14.3491
1854	17.545	1854	14.3642
1855	16.9343	1855	14.8986
1856	16.2032	1856	15.2141
1857	17.3923	1857	14.2725
1858	17.8736	1858	14.6055
1859	17.1534	1859	15.7675
1860	15.9718	1860	13.9521
1861	17.5504	1861	14.9122
1862	17.753	1862	14.8079
1863	16.407	1863	14.6967
1864	17.903	1864	15.086
1865	18.0721	1865	14.8073
1866	17.5253	1866	14.234
1867	16.8768	1867	13.9826
1868	17.6617	1868	16.2674
1869	16.6372	1869	14.6726
1870	17.1282	1870	14.7534
1871	18.0676	1871	14.9346
1872	16.9548	1872	14.2459
1873	17.7942	1873	15.2554
1874	17.0697	1874	15.3122
1875	17.585	1875	15.2448
1876	17.6728	1876	14.2208
1877	16.4006	1877	14.5644
1878	18.0982	1878	13.2909
1879	18.0763	1879	13.9598
1880	17.1712	1880	13.9421
1881	17.1204	1881	14.5628
1882	18.2223	1882	15.8715
1883	17.6317	1883	14.3035
1884	17.791	1884	14.2824
1885	17.3908	1885	13.073
1886	17.4261	1886	14.7933
1887	17.6938	1887	14.2284
1888	16.6166	1888	15.8371
1889	16.5647	1889	13.3761
1890	16.27	1890	14.9377
1891	16.1302	1891	14.552
1892	16.8668	1892	14.4938
1893	17.5731	1893	13.8632
1894	17.0277	1894	13.2574
1895	17.1819	1895	13.2727
1896	15.7457	1896	14.0454
1897	16.4645	1897	14.2537
1898	18.1253	1898	16.3579
1899	17.1433	1899	15.0484
1900	18.0077	1900	14.3652
1901	17.0633	1901	13.6257
1902	16.5967	1902	14.8008
1903	16.8751	1903	15.0627
1904	18.2865	1904	13.8702
1905	16.0394	1905	14.581
1906	17.6354	1906	15.0708
1907	17.5652	1907	15.8939
1908	17.4902	1908	14.1174
1909	17.2755	1909	16.2616
1910	17.3839	1910	15.9534
1911	18.2323	1911	14.2117
1912	16.2056	1912	14.987
1913	17.6031	1913	16.0663
1914	17.1991	1914	13.2632
1915	17.9916	1915	14.7518
1916	17.5227	1916	13.8618
1917	17.062	1917	14.6506
1918	17.5302	1918	14.2275
1919	17.2016	1919	14.2943
1920	17.7675	1920	15.3615
1921	16.9112	1921	14.8642
1922	17	1922	13.5845
1923	16.7723	1923	15.0646
1924	17.4154	1924	13.8313
1925	17.6972	1925	13.7186
1926	16.3897	1926	13.9667
1927	17.9272	1927	14.6021
1928	17.2553	1928	14.7636
1929	18.2688	1929	14.0018
1930	17.4608	1930	12.9129
1931	16.5483	1931	14.3925
1932	18.0318	1932	15.7608
1933	16.0595	1933	14.6404
1934	17.8227	1934	14.0297
1935	17.1351	1935	15.7688
1936	17.2309	1936	15.5675
1937	17.4796	1937	15.5514
1938	18.1756	1938	14.2718
1939	17.0384	1939	14.2275
1940	17.6451	1940	13.4999
1941	17.6615	1941	13.6018
1942	16.5823	1942	15.4319
1943	15.919	1943	14.5511
1944	18.4089	1944	14.6596
1945	17.4014	1945	14.9153
1946	17.4933	1946	14.6725
1947	17.3948	1947	14.2202
1948	17.9497	1948	15.0125
1949	17.2995	1949	14.5286
1950	17.1601	1950	13.7616
1951	17.3371	1951	13.995
1952	17.7071	1952	15.2933
1953	17.4601	1953	13.0135
1954	16.2084	1954	14.0656
1955	17.6837	1955	14.1706
1956	17.305	1956	16.53
1957	17.4959	1957	13.1873
1958	17.1296	1958	15.2759
1959	17.4326	1959	13.5954
1960	18.1644	1960	15.1366
1961	17.7806	1961	14.7921
1962	17.5502	1962	14.5119
1963	17.6138	1963	14.0795
1964	17.8537	1964	14.9564
1965	17.0386	1965	15.8327
1966	17.4543	1966	13.8459
1967	16.2188	1967	14.4308
1968	16.4759	1968	15.0521
1969	17.8419	1969	14.9197
1970	18.0102	1970	14.2877
1971	17.1338	1971	15.1454
1972	17.2311	1972	15.0949
1973	17.5836	1973	15.1097
1974	17.0756	1974	14.5162
1975	18.2279	1975	12.9024
1976	17.3335	1976	14.2166
1977	16.8649	1977	15.2997
1978	18.2126	1978	14.4094
1979	17.0359	1979	15.0112
1980	16.8486	1980	14.7003
1981	15.4989	1981	14.2427
1982	17.0629	1982	15.1279
1983	17.5079	1983	14.1154
1984	16.7964	1984	14.9107
1985	16.6334	1985	14.8352
1986	16.2533	1986	14.5479
1987	17.2172	1987	15.1019
1988	16.7016	1988	14.4367
1989	17.0645	1989	14.1348
1990	16.6931	1990	13.8856
1991	16.4567	1991	15.6889
1992	17.0477	1992	14.438
1993	17.5085	1993	14.021
1994	16.1391	1994	14.1721
1995	17.4151	1995	14.9826
1996	18.0381	1996	13.7112
1997	17.3882	1997	14.8485
1998	17.2574	1998	14.8718
1999	17.3034	1999	15.3658
[truncated: 27,544 more rows]
